# Supplementary material for: Interaction of testosterone-based compounds with dodecyl sulphate monolayers at the air–water interface
Source: Royal Society of Chemistry journal article supplement (doi:10.1039/c7cp07611h), 2018-01-01
Supplement: c7cp07611h1.pdf [file c7cp07611h1.pdf]

# **Electronic Supplementary Information for 'Interaction of Testosterone-Based Compounds with Dodecyl Sulphate Monolayers at the Air-Water Interface'**

Daniel T. Allen,<sup>†</sup> Nikou Damestani,<sup>†</sup> Yussif Saaka,<sup>‡</sup> M. Jayne Lawrence,<sup>¶</sup> and  
Christian D. Lorenz<sup>\*,†</sup>

<sup>†</sup>*Biological Physics & Soft Matter Group, Department of Physics, Strand Campus, Kings  
College London, Strand, London WC2R 2LS*

<sup>‡</sup>*Pharmaceutical Biophysics Group, Institute of Pharmaceutical Science, Franklin-Wilkins  
Building, King's College London, 150 Stamford Street, London SE1 9NH, United Kingdom*

<sup>¶</sup>*Division of Pharmacy and Optometry, School of Health Sciences, Stopford Building, The  
University of Manchester, Oxford Road, Manchester M13 9PT, United Kingdom.*

E-mail: [chris.lorenz@kcl.ac.uk](mailto:chris.lorenz@kcl.ac.uk)

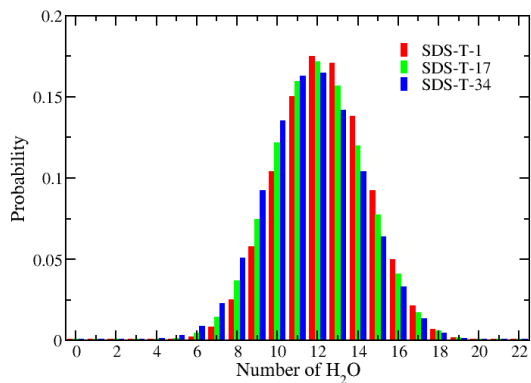

(a)

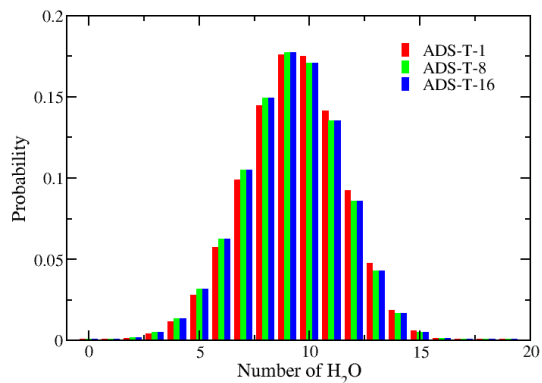

(b)

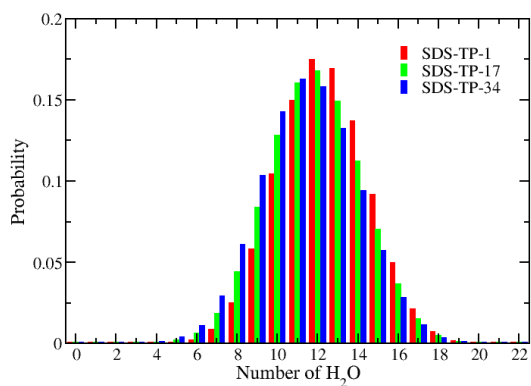

(c)

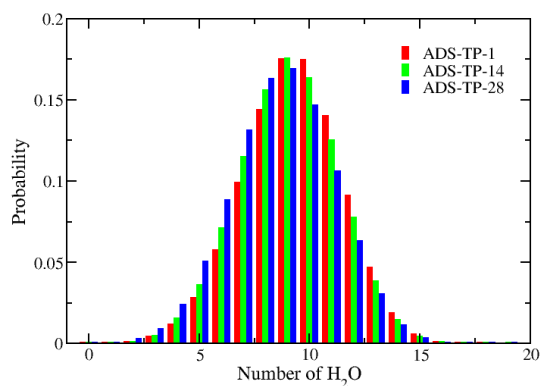

(d)

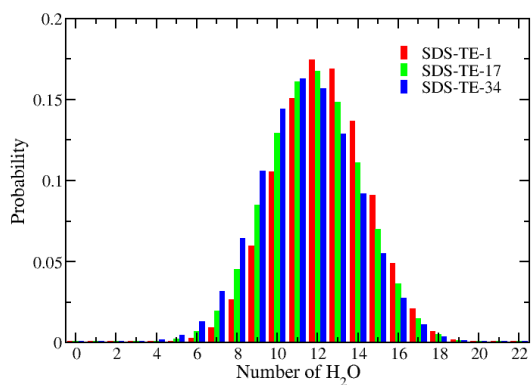

(e)

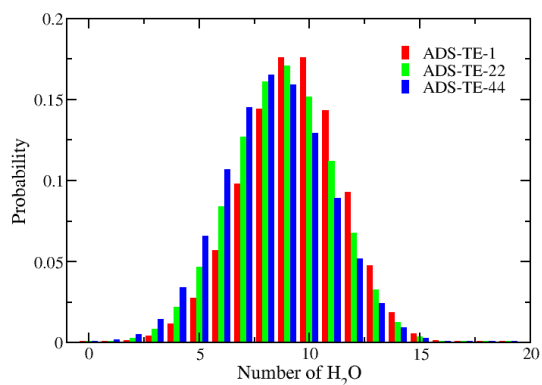

(f)

Figure 1: Distribution of the number of water molecules found within first hydration shell of the sulfur atom in the  $\text{DS}^-$  headgroup in the presence of the different drug molecules within the SDS and ADS monolayers.

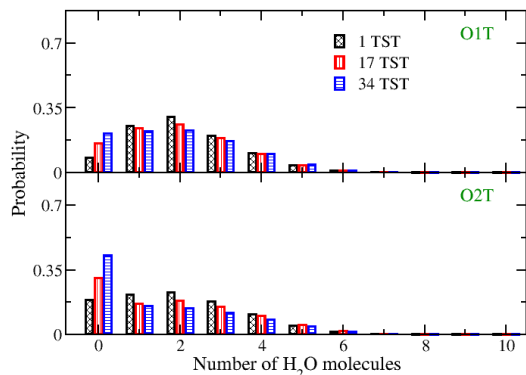

(a)

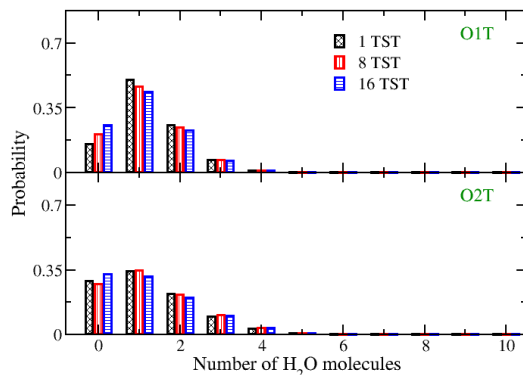

(b)

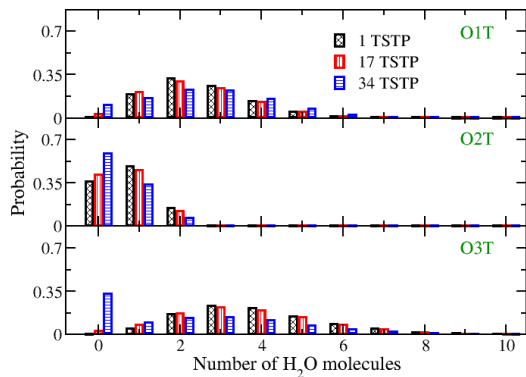

(c)

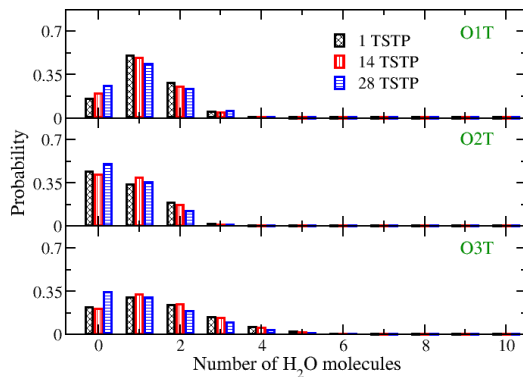

(d)

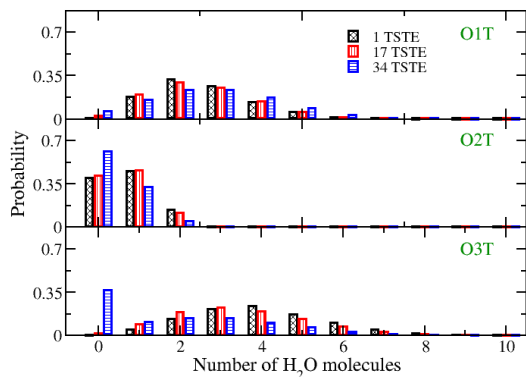

(e)

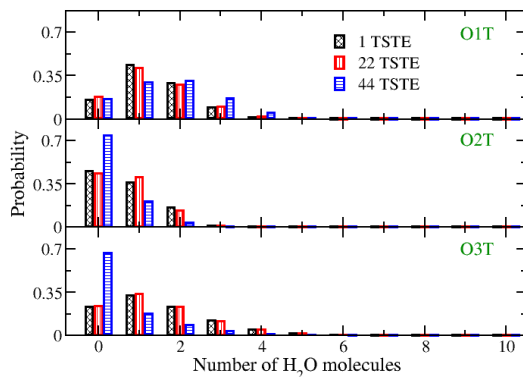

(f)

Figure 2: Distribution of the number of water molecules found within first hydration shell of each polar atom on the different drug molecules within the SDS and ADS monolayers.

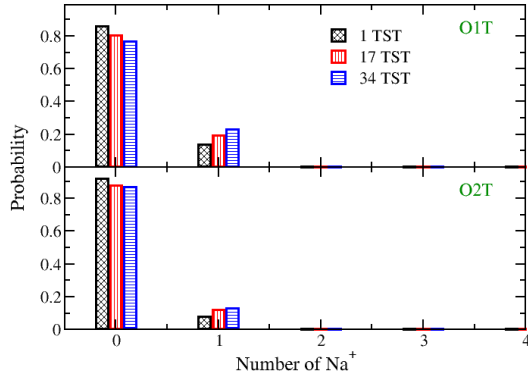

(a)

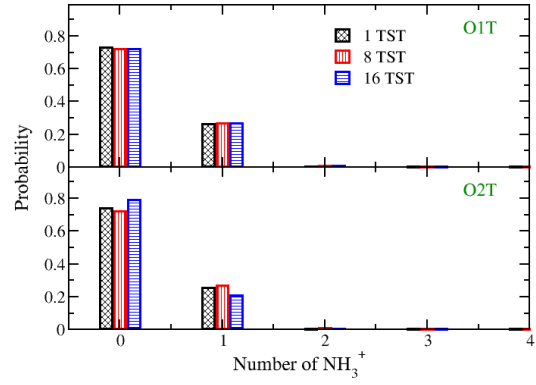

(b)

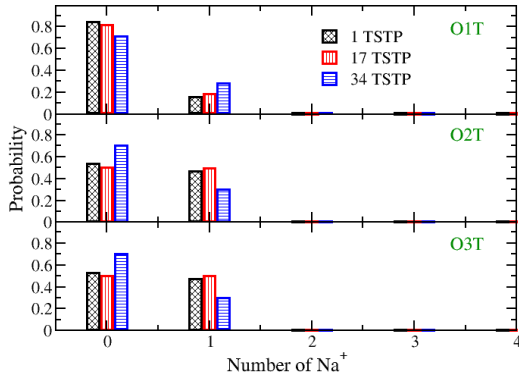

(c)

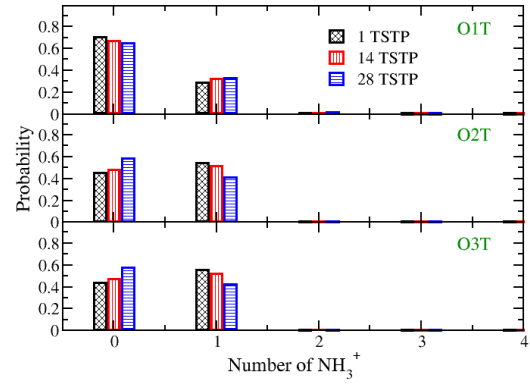

(d)

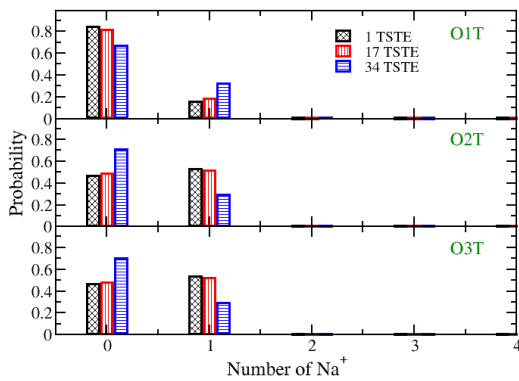

(e)

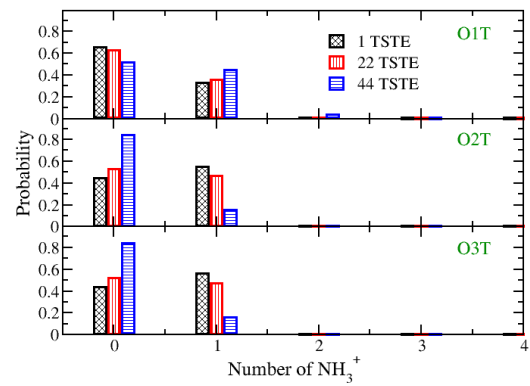

(f)

Figure 3: Distribution of the number of cations found within first neighbour shell of the sulfur atom in the  $\text{DS}^-$  headgroup in the presence of the different drug molecules within the SDS and ADS monolayers.

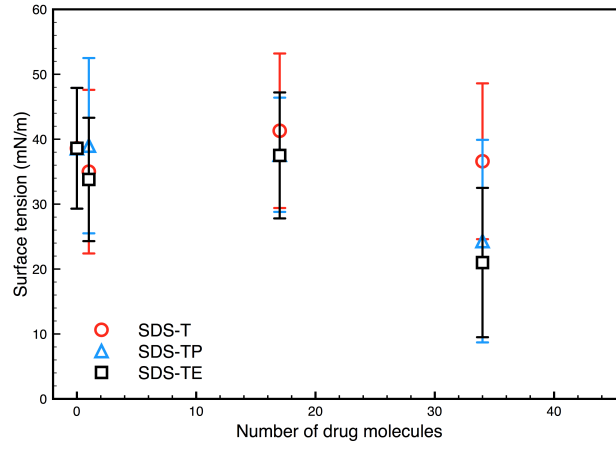

(a)

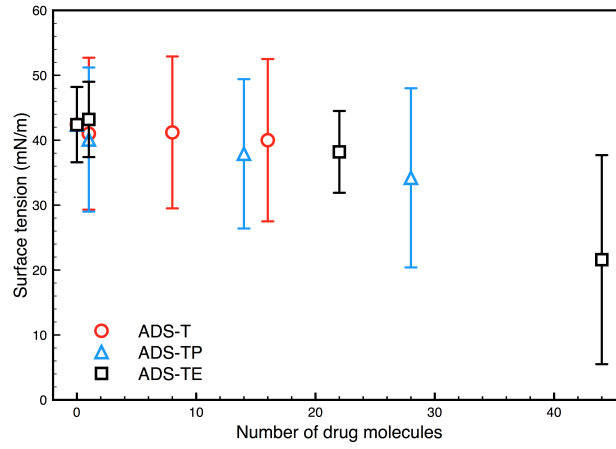

(b)

Figure 4: Surface tension (mN/m) plotted as a function of the number of drug molecules in (a) SDS and (b) ADS monolayers.
